# Supplementary material for: Stress-mediated formation of nanocrystalline calcitic microlens arrays
Source: Royal Society of Chemistry journal article supplement (doi:10.1039/c5ce01757b), 2015-01-01
Supplement: c5ce01757b1.pdf [file c5ce01757b1.pdf]

**Supporting Information**

**Stress-mediated formation of nanocrystalline calcitic  
microlens arrays**

*Ingo Schmidt, Emil Zolotoyabko, Peter Werner, Kyubock Lee, Manfred Burghammer, Peter  
Fratzl\*, Wolfgang Wagermaier*

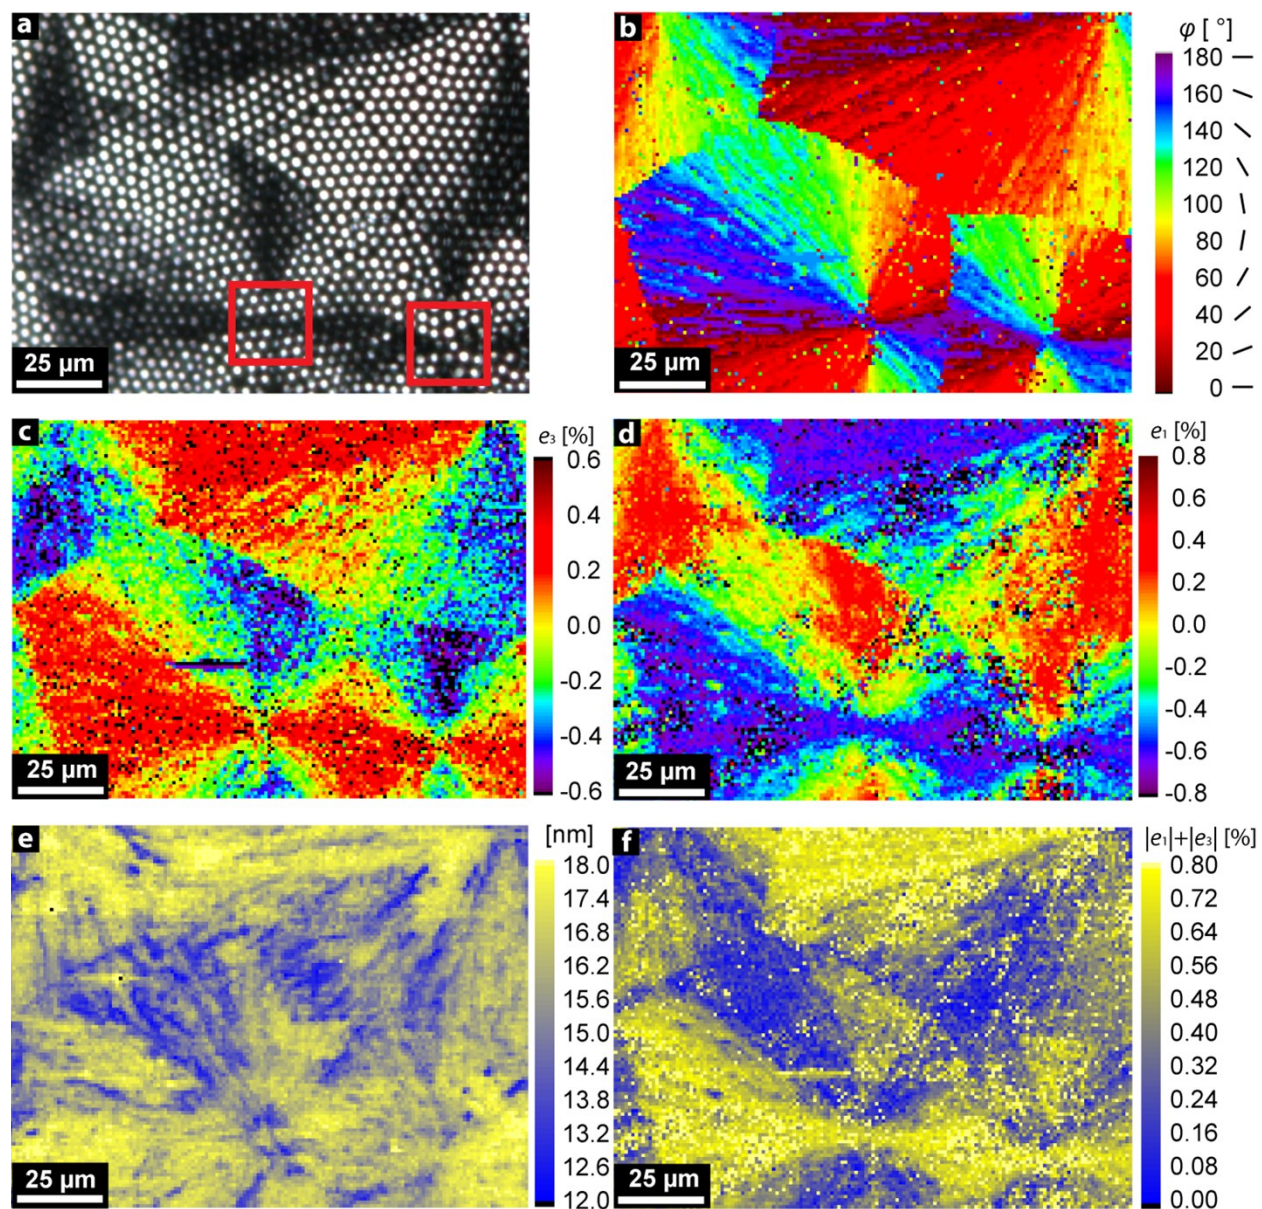

**Figure S1.** Summary of experimental results obtained for the second investigated sample: (a) – POM image with two Maltese crosses (centers outlined by red squares); (b) – mapping of the c-axis orientation (angle  $\varphi$ ) with respect to the horizontal axis of the image plane; (c), (d) – mapping of relative lattice distortions (in %),  $e_3$  and  $e_1$ , respectively. Tensile-type distortions are colored in red, while compression-type distortions are colored in blue; (e) – mapping of crystallite size; (f) - mapping of the sum of relative distortions (in %),  $|e_1| + |e_3|$ .



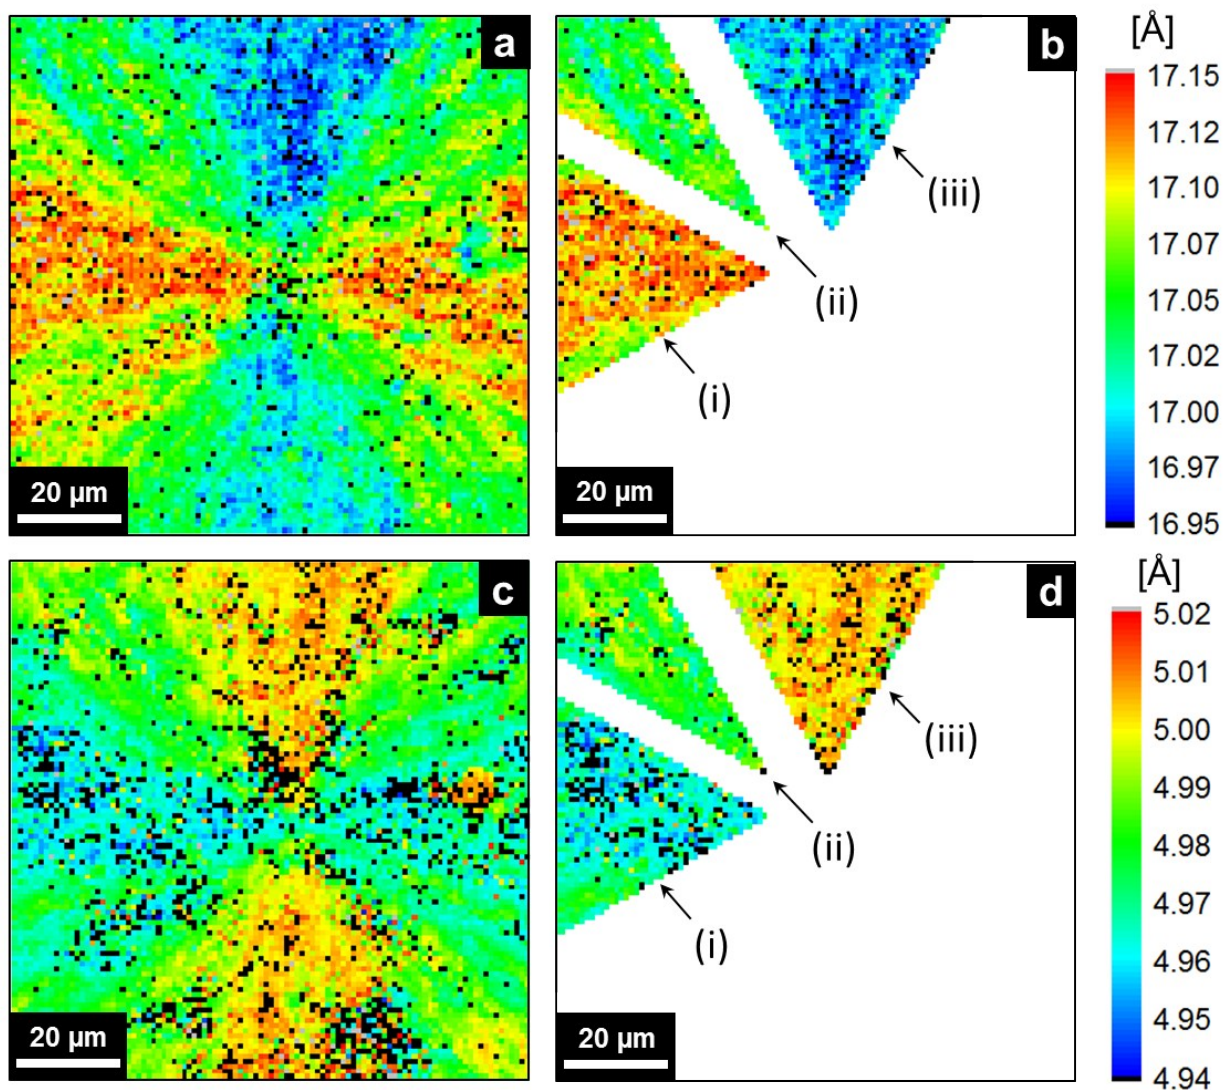

**Figure S2.** Mapping of the calcite lattice parameters  $c$  (maps (a) and (b)) and  $a$  (maps (c) and (d)) across MLA (first sample). Map (a) represents the distribution of the  $c$ -magnitudes across a whole measured region. Map (b) shows three regions of interest from map (a): (i)  $c$  is longer than that in geological calcite; (ii)  $c$  is comparable with that in geological calcite; (iii)  $c$  is shorter than that in geological calcite. Map (c) represents the distribution of the  $a$ -magnitudes across a whole measured region. Map (d) shows three regions of interest from map (c): (i)  $a$  is shorter than that in geological calcite, (ii)  $a$  is comparable with that in geological calcite and (iii)  $a$  is longer than that in geological calcite.

### One Way Analysis of Variance on Ranks for lattice parameter *c*

| Group          | N    | Missing | Median [Å] | 25%    | 75%    |
|----------------|------|---------|------------|--------|--------|
| <i>c</i> (i)   | 1008 | 51      | 17.113     | 17.099 | 17.125 |
| <i>c</i> (ii)  | 789  | 15      | 17.050     | 17.032 | 17.067 |
| <i>c</i> (iii) | 1008 | 30      | 16.985     | 16.972 | 16.998 |

The differences in the median values among the treatment groups are greater than would be expected by chance; there is a statistically significant difference ( $P = < 0.001$ )

All Pairwise Multiple Comparison Procedures (Dunn's Method):

| Comparison                      | Diff of Ranks | Q      | P < 0.05 |
|---------------------------------|---------------|--------|----------|
| <i>c</i> (i) vs <i>c</i> (iii)  | 1645.447      | 46.267 | Yes      |
| <i>c</i> (i) vs <i>c</i> (ii)   | 808.849       | 21.392 | Yes      |
| <i>c</i> (ii) vs <i>c</i> (iii) | 836.598       | 22.233 | Yes      |

### One Way Analysis of Variance on Ranks for lattice parameter *a*

| Group          | N    | Missing | Median [Å] | 25%   | 75%   |
|----------------|------|---------|------------|-------|-------|
| <i>a</i> (i)   | 1008 | 108     | 4.963      | 4.959 | 4.970 |
| <i>a</i> (ii)  | 788  | 35      | 4.982      | 4.975 | 4.988 |
| <i>a</i> (iii) | 1006 | 103     | 5.002      | 4.998 | 5.006 |

The differences in the median values among the treatment groups are greater than would be expected by chance; there is a statistically significant difference ( $P = < 0.001$ )

All Pairwise Multiple Comparison Procedures (Dunn's Method):

| Comparison                      | Diff of Ranks | Q      | P < 0.05 |
|---------------------------------|---------------|--------|----------|
| <i>a</i> (iii) vs <i>a</i> (i)  | 1486.530      | 42.765 | Yes      |
| <i>a</i> (iii) vs <i>a</i> (ii) | 830.822       | 22.812 | Yes      |
| <i>a</i> (ii) vs <i>a</i> (i)   | 655.709       | 17.990 | Yes      |

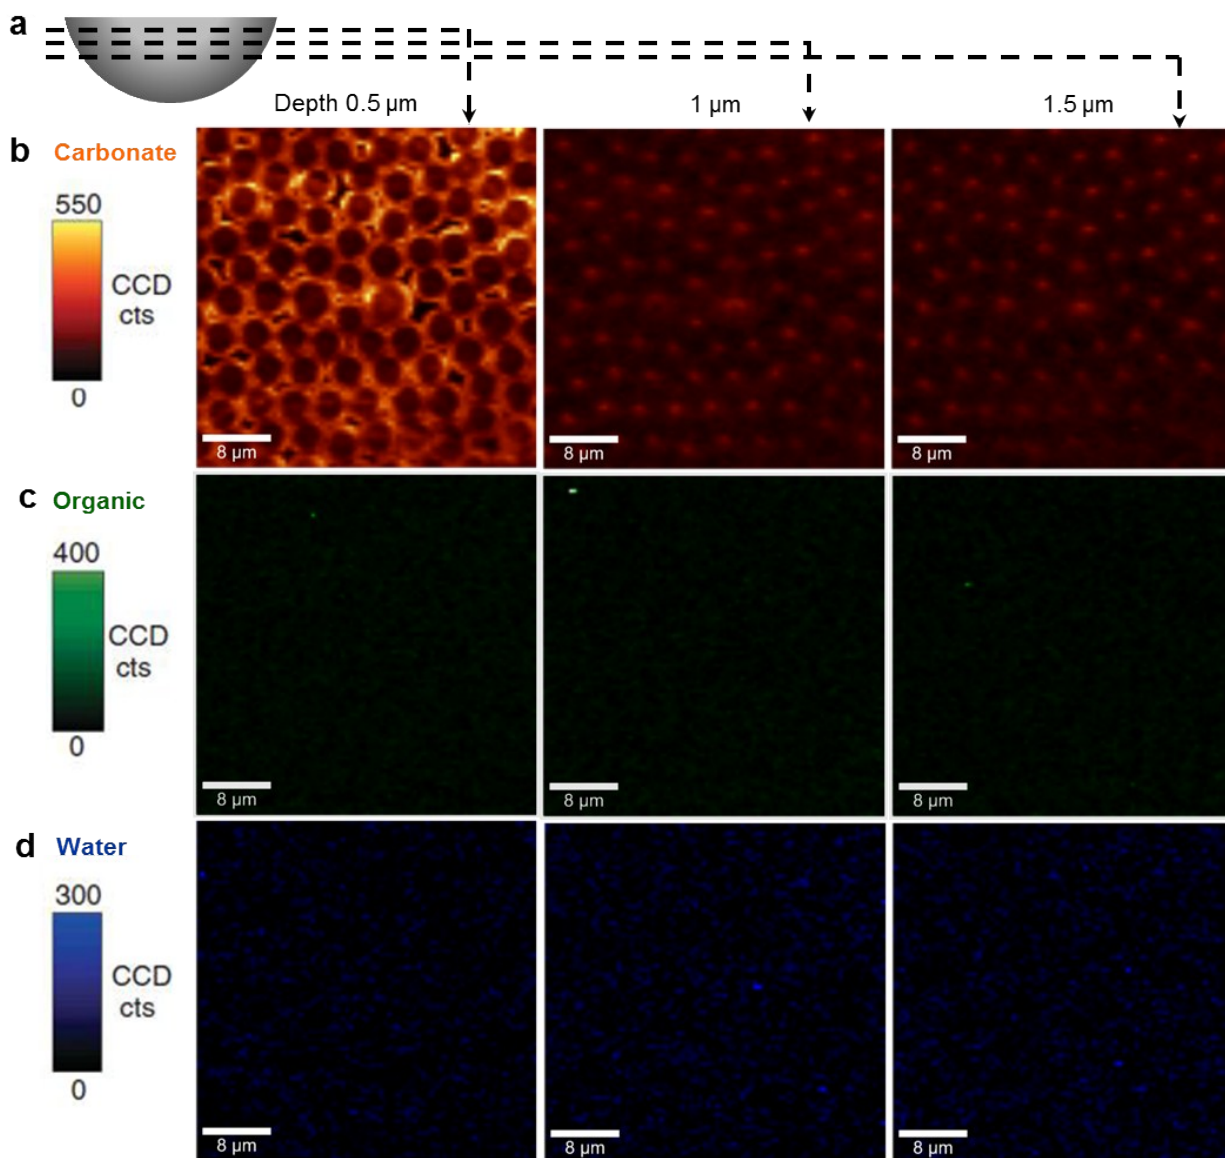

**Figure S3.** Confocal Raman imaging and characterization of calcitic MLA performed at different depths,  $z = 0.5 \mu\text{m}$ ;  $1 \mu\text{m}$ ;  $1.5 \mu\text{m}$ , as indicated in (a). Images are taken in three spectral intervals, characteristic for: (b) carbonate ( $1.040\text{-}1.125 \text{ cm}^{-1}$ ), (c) organics ( $2.800\text{-}3.000 \text{ cm}^{-1}$ ), and (d) water ( $3.000\text{-}3.500 \text{ cm}^{-1}$ ). No signal from polysorbate 20 was found at all probed depths after crystallization.
